# Supplementary material
Source: Springer Nature journal article supplement (https://www.springermedizin.de/resource/supplementary/12916_2009_213_MOESM1_ESM.pdf/9599406)

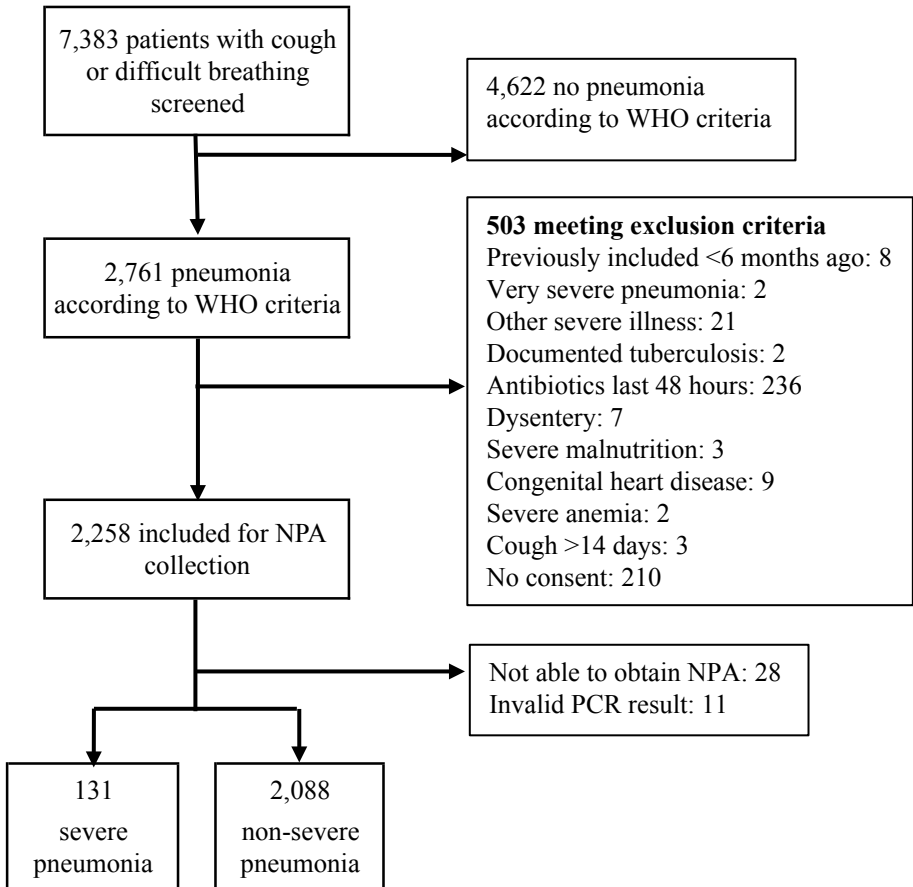

Supplement: MOESM1 [file 9599406]
